# Supplementary material
Source: PubMed Central journal article supplement (PMC6885645)
Supplement: supp_RA119.009282_152728_2_supp_411593_pzkdjq.pdf [file supp_RA119.009282_152728_2_supp_411593_pzkdjq.pdf]

**Aryl hydrocarbon receptor (AhR) regulates adipocyte differentiation by assembling  
CRL4B ubiquitin ligase to target PPAR $\gamma$  for proteasomal degradation**

Hao Dou<sup>1</sup>, Yuyao Duan<sup>1</sup>, Xiaohui Zhang<sup>1</sup>, Qian Yu<sup>1</sup>, Qian Di<sup>1</sup>, Yu Song<sup>1</sup>, Peishan Li<sup>1</sup> and Yaoqin Gong<sup>1,\*</sup>

From the <sup>1</sup>The Key Laboratory of Experimental Teratology, Ministry of Education and Department of Molecular Medicine and Genetics, School of Basic Medical Sciences, Shandong University, Jinan, Shandong, 250012, P.R.China.

**List of the supporting information:**

**Table S1. Primers used in real-time PCR.**

**Figure S1. 3T3-L1 differentiation.**

**Figure S2. Efficiency of the overexpression and knockdown of AhR in 3T3-L1 cells.**

**Figure S3. AhR did not affect the transcriptional level of PPAR $\gamma$ .**

**Figure S4. Defect in ubiquitination does not increase acetylation level of PPAR $\gamma$ .**

**Table S1. Primers used in real-time PCR.**

|                    |                               |
|--------------------|-------------------------------|
| AhR fwd:           | 5'-GCCAGGACCAGTGTAGAGC-3'     |
| AhR rev:           | 5'- ATTCAGCGCCTGTAACAAGAA -3' |
| PPAR $\gamma$ fwd: | 5'- CCATTCTGGCCCACCAAC -3'    |
| PPAR $\gamma$ rev: | 5'- AATGCGAGTGGTCTTCCATCA -3' |
| CUL4B fwd:         | 5'- ACCTCGTCCTTCTGCCTTGGG -3' |
| CUL4B rev:         | 5'- CTGAGCCGGGCTTGCTGTTAG -3' |
| GAPDH fwd:         | 5'- TGTGTCCGTCGTGGATCTGA -3'  |
| GAPDH rev:         | 5'- CCTGCTTCACCACCTTCTTGAT-3' |
| Fabp4 fwd:         | 5'- GATGCCTTTGTGGGAACCTG -3'  |
| Fabp4 rev:         | 5'- TCCTGTCGTCTGCGGTGATT -3'  |
| Adipsin fwd:       | 5'- CTGAACCCTACAAGCGAT -3'    |
| Adipsin rev:       | 5'- GACCCAACGAGGCATTCT -3'    |
| CD36 fwd:          | 5'- GGCCAACGTATTGCGACAT -3'   |
| CD36 rev:          | 5'- CAGATCCGAACACAGCGTAGA -3' |

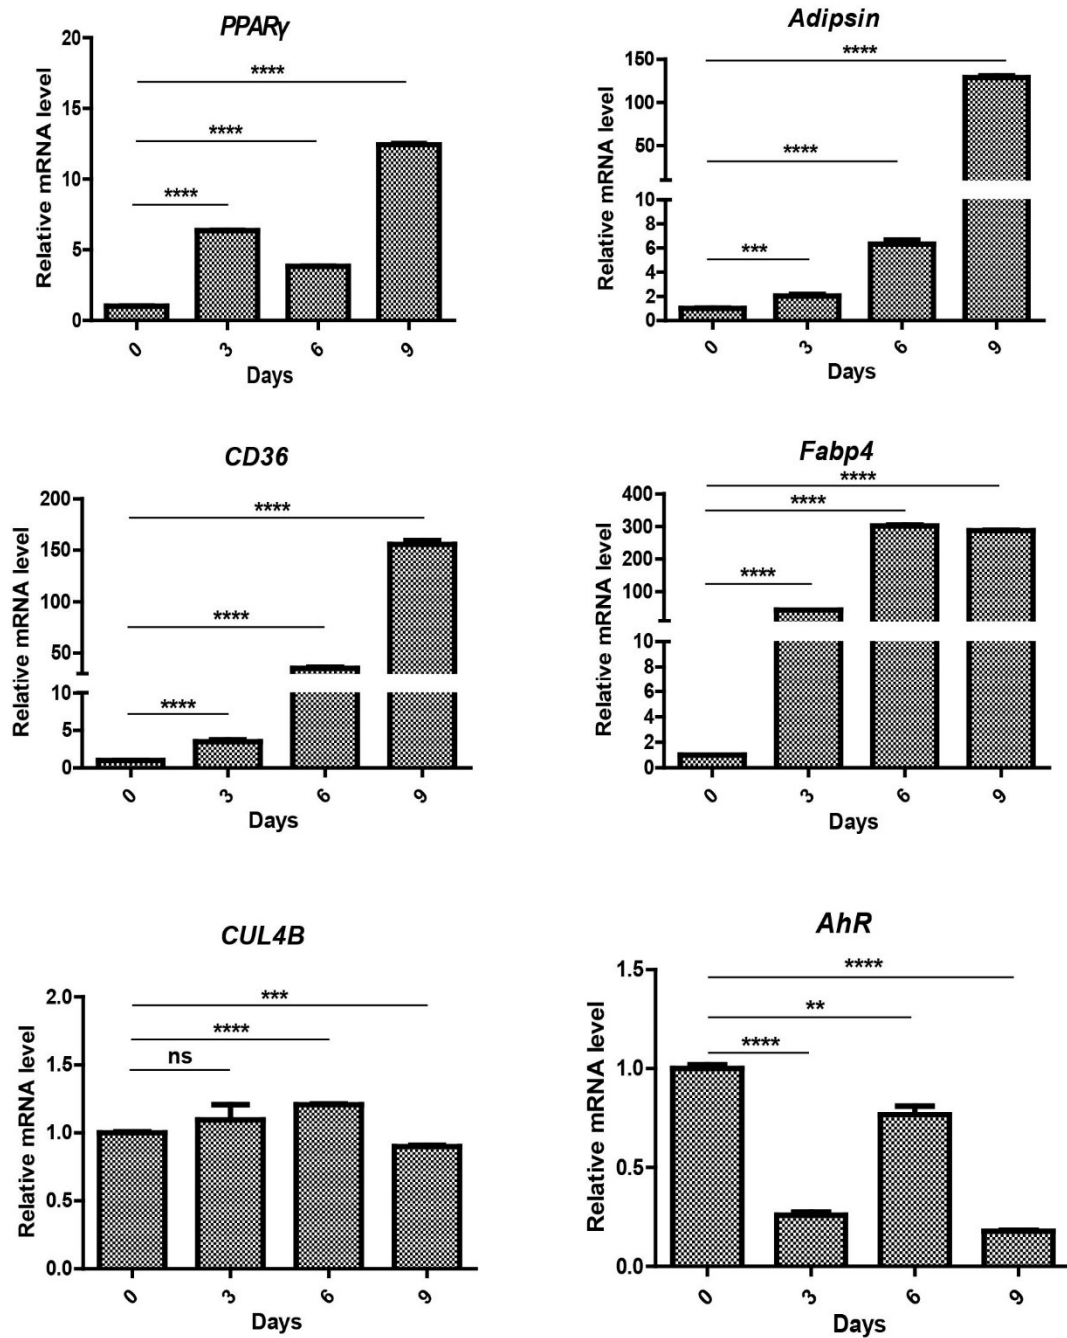

**Figure S1. 3T3-L1 differentiation.** mRNA levels of *PPAR $\gamma$*  and its related genes in 3T3-L1 cells. At different time points post-treatment, total RNA samples were extracted and subjected to qRT-PCR analysis of related genes (*Fabp4*, *CD36*, *Adipsin*, *Cul4b* and *Ahr*). Data were presented as mean  $\pm$  SD.; n=4 with \*\* $P < 0.01$ , \*\*\* $P < 0.001$  by student's *t* test.

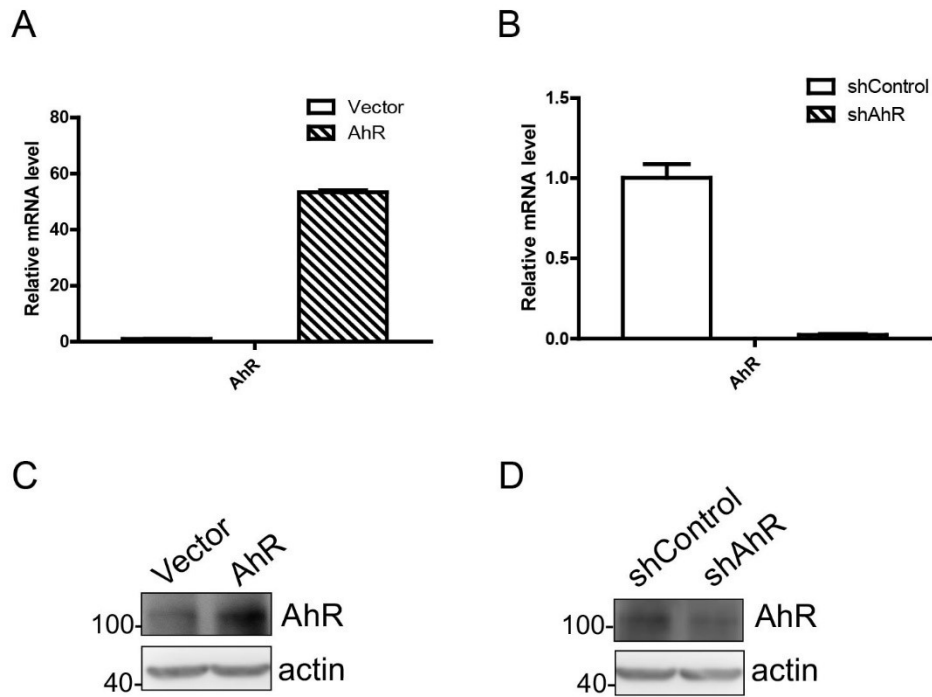

**Figure S2. Efficiency of the overexpression and knockdown of AhR in 3T3-L1 cells.**

A and B, The mRNA levels of overexpression and knockdown of AhR were validated by qPCR.

C and D, The protein levels of overexpression and knockdown of AhR were validated by Western blots.

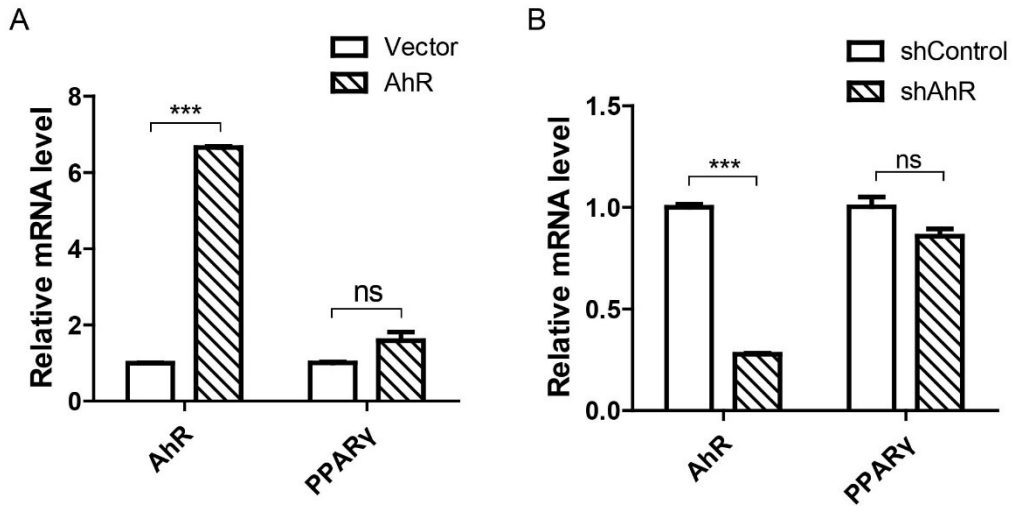

**Figure S3. AhR did not affect the transcriptional level of PPAR $\gamma$ .**

A, AhR did not affect PPAR $\gamma$  mRNA level in wild-type and AhR overexpression 3T3-L1 cells. mRNA levels were measured by qRT-PCR analysis using primers targeted for AhR and PPAR $\gamma$ .  
 B, AhR did not affect PPAR $\gamma$  mRNA level in wild-type and AhR knockdown 3T3-L1 cells. mRNA levels were measured by qRT-PCR analysis using primers targeted for AhR and PPAR $\gamma$ .

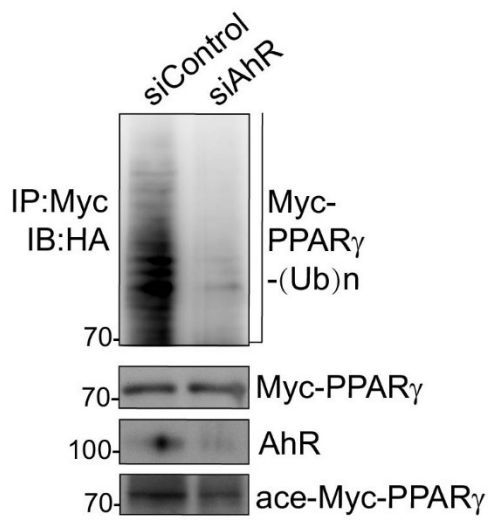

**Figure S4. Defect in ubiquitination does not increase acetylation level of PPAR $\gamma$ .**  
 3T3-L1 cells were first transfected with siAhR or siControl. Cells were then transfected with plasmids expressing Flag-Cul4B, HA-Ub and Myc-PPAR $\gamma$ . Cells were treated with MG132 for 3 hours. Cells were then harvested for the following immunoprecipitation and Western blotting. Input (5%) was used for Western blotting.
