# Supplementary material
Source: PubMed Central journal article supplement (PMC6885645)

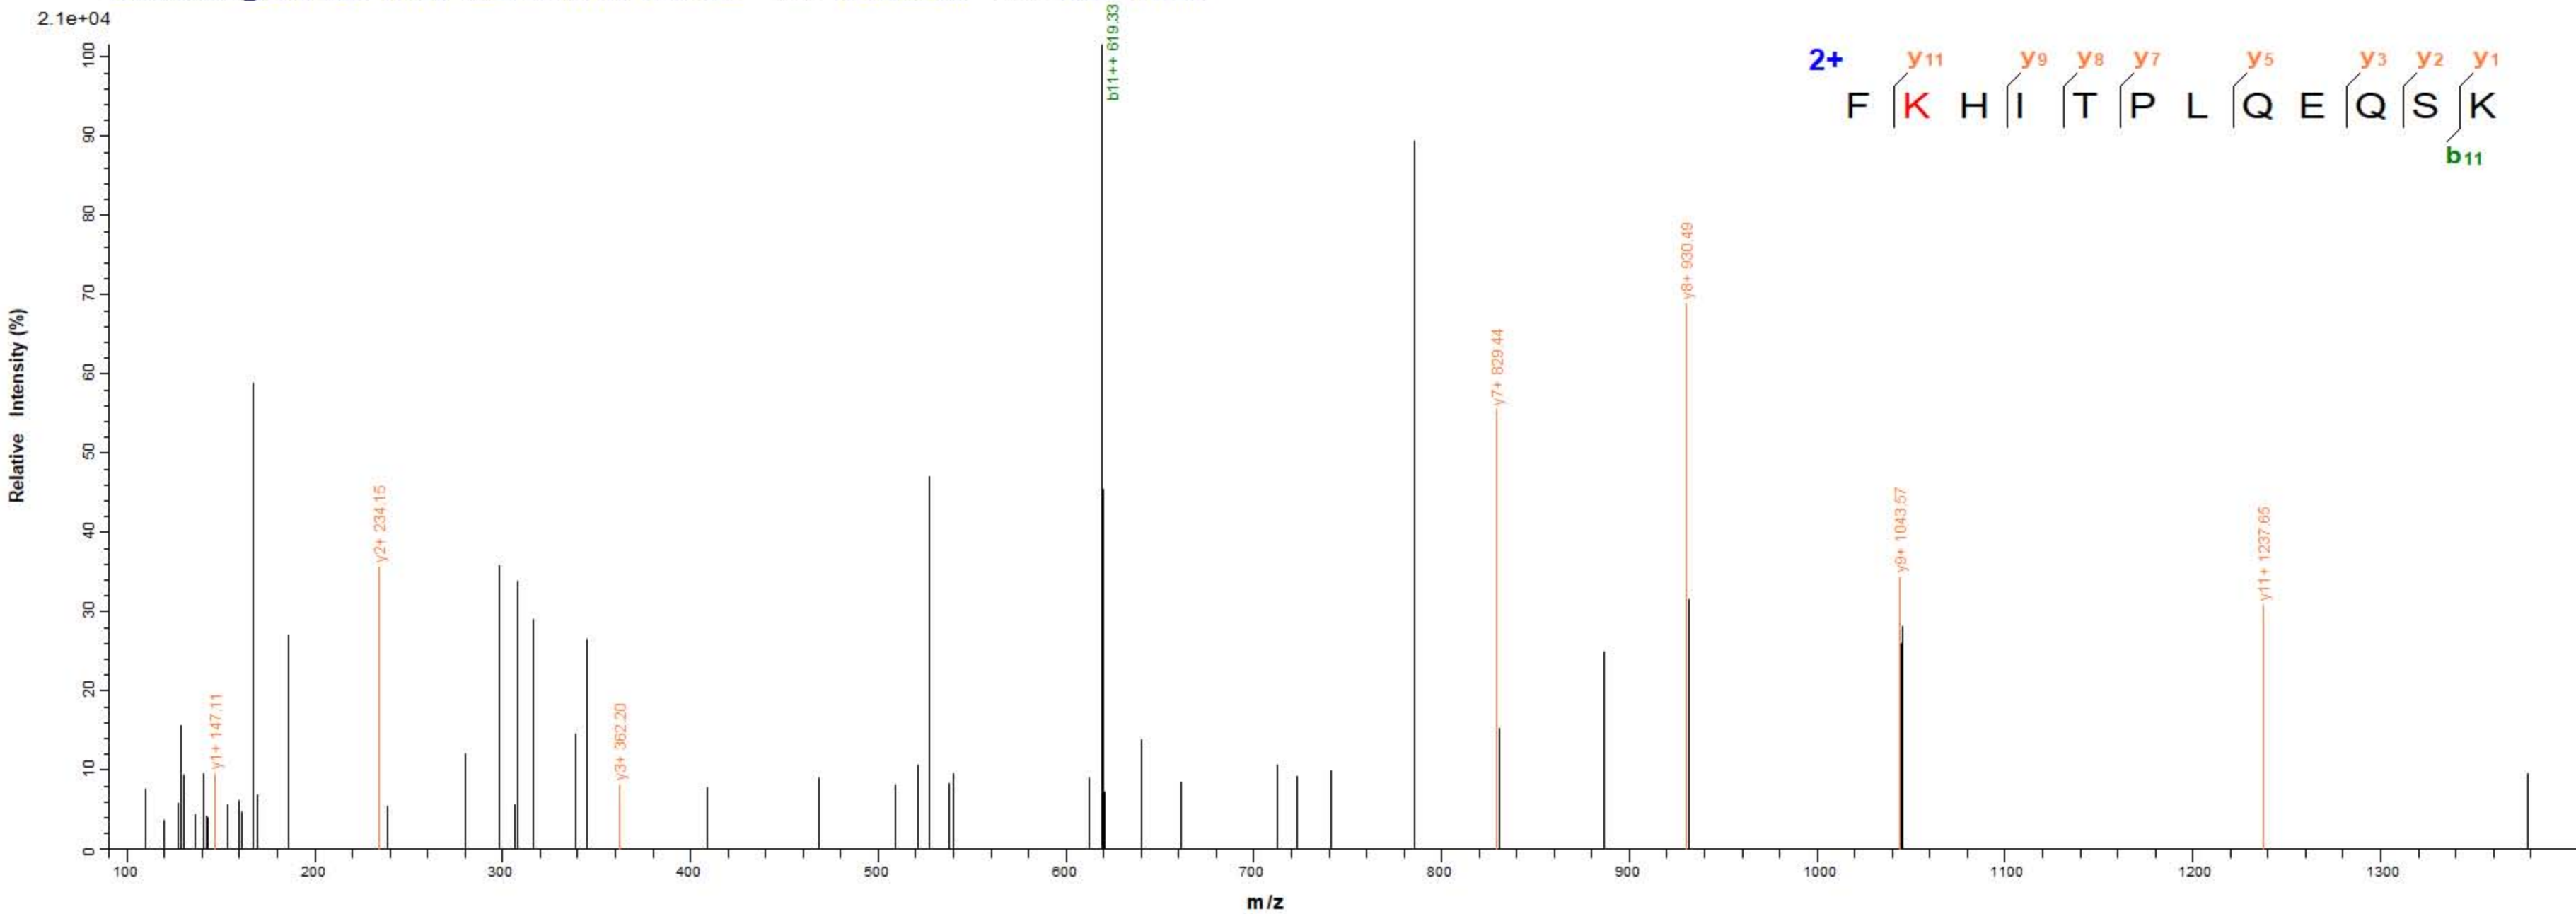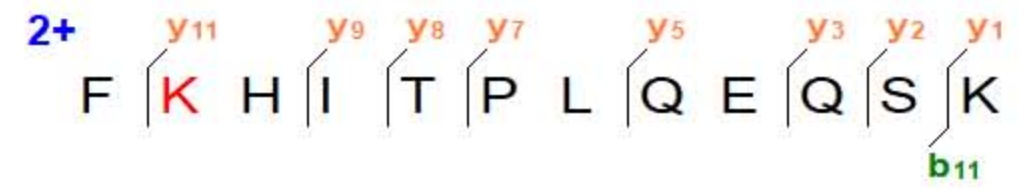

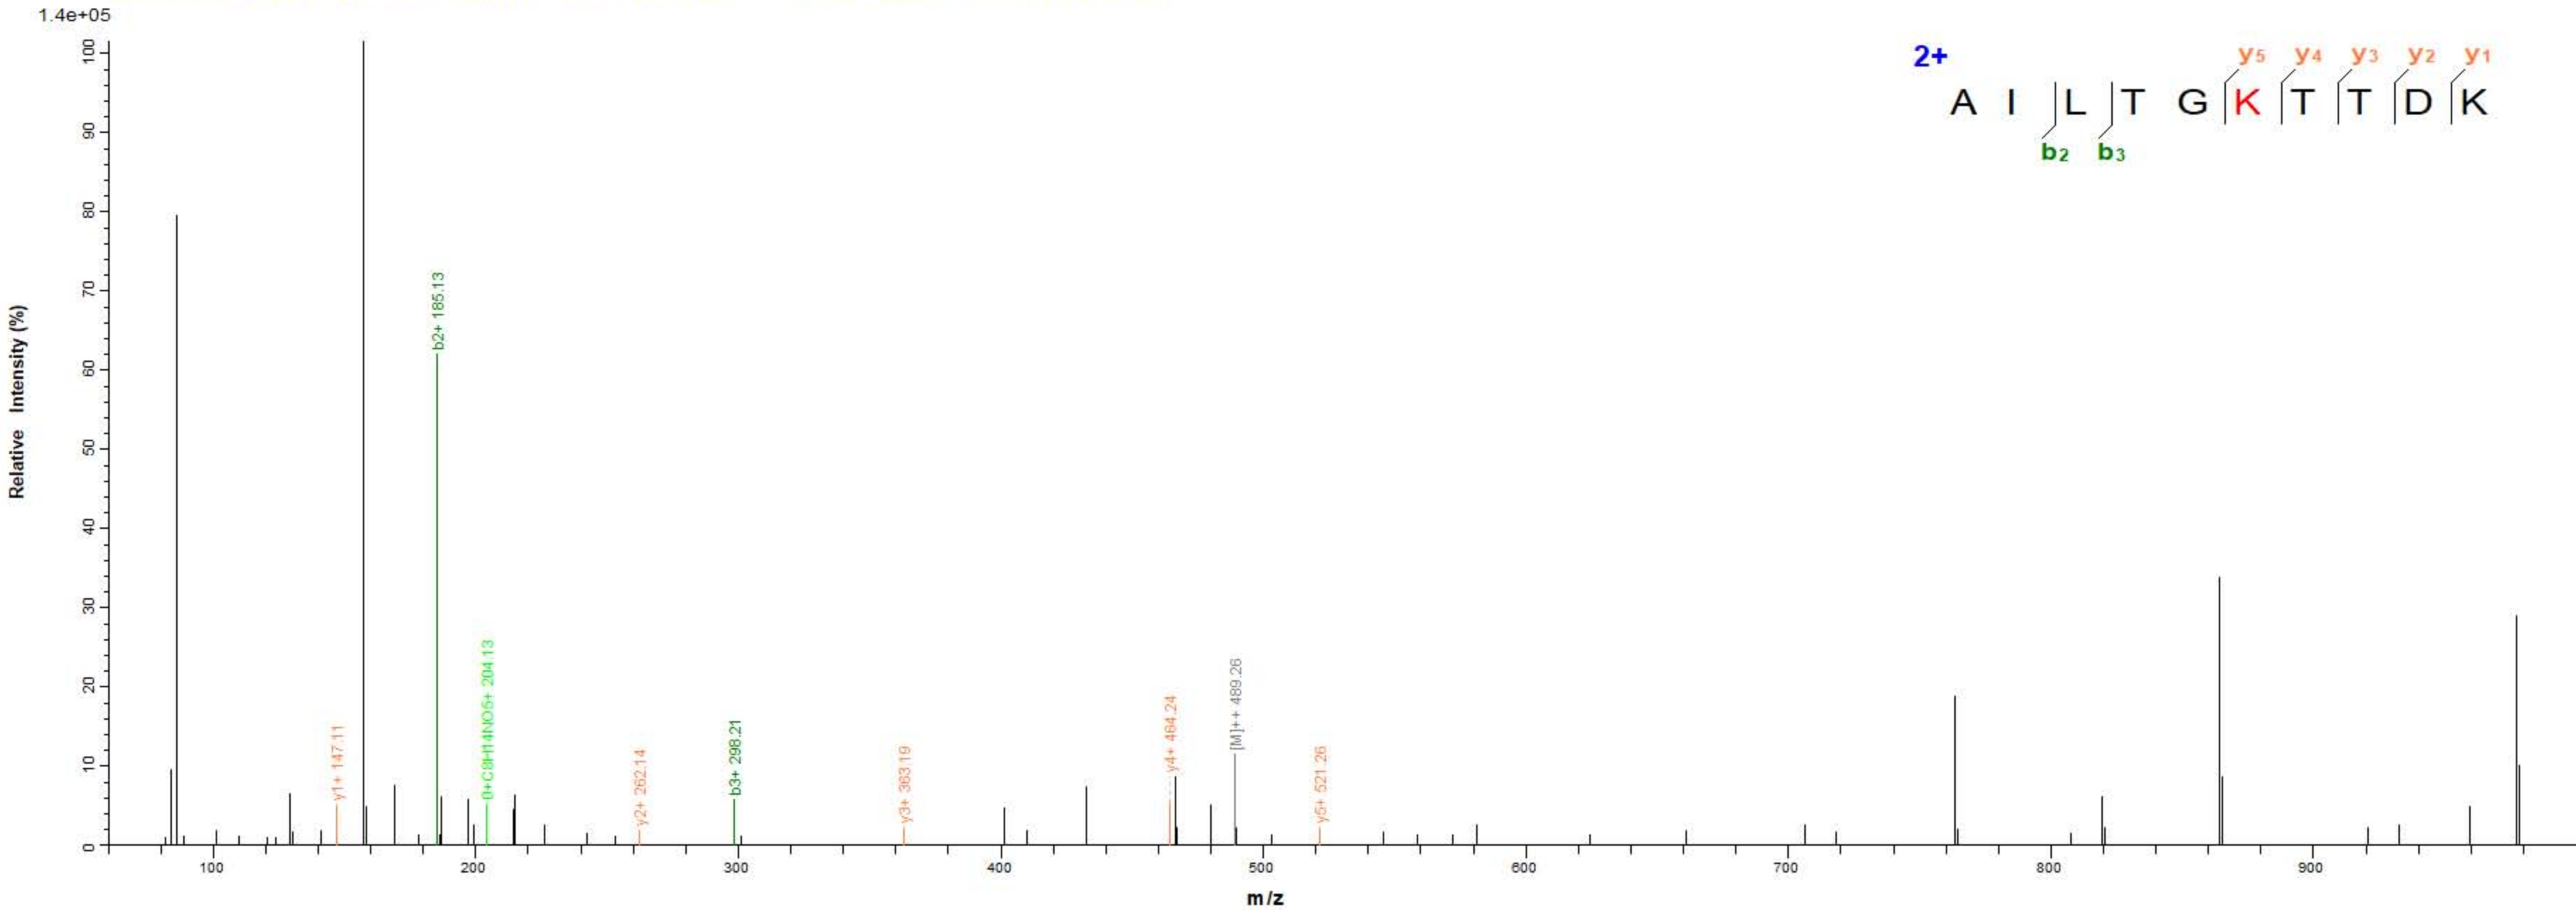

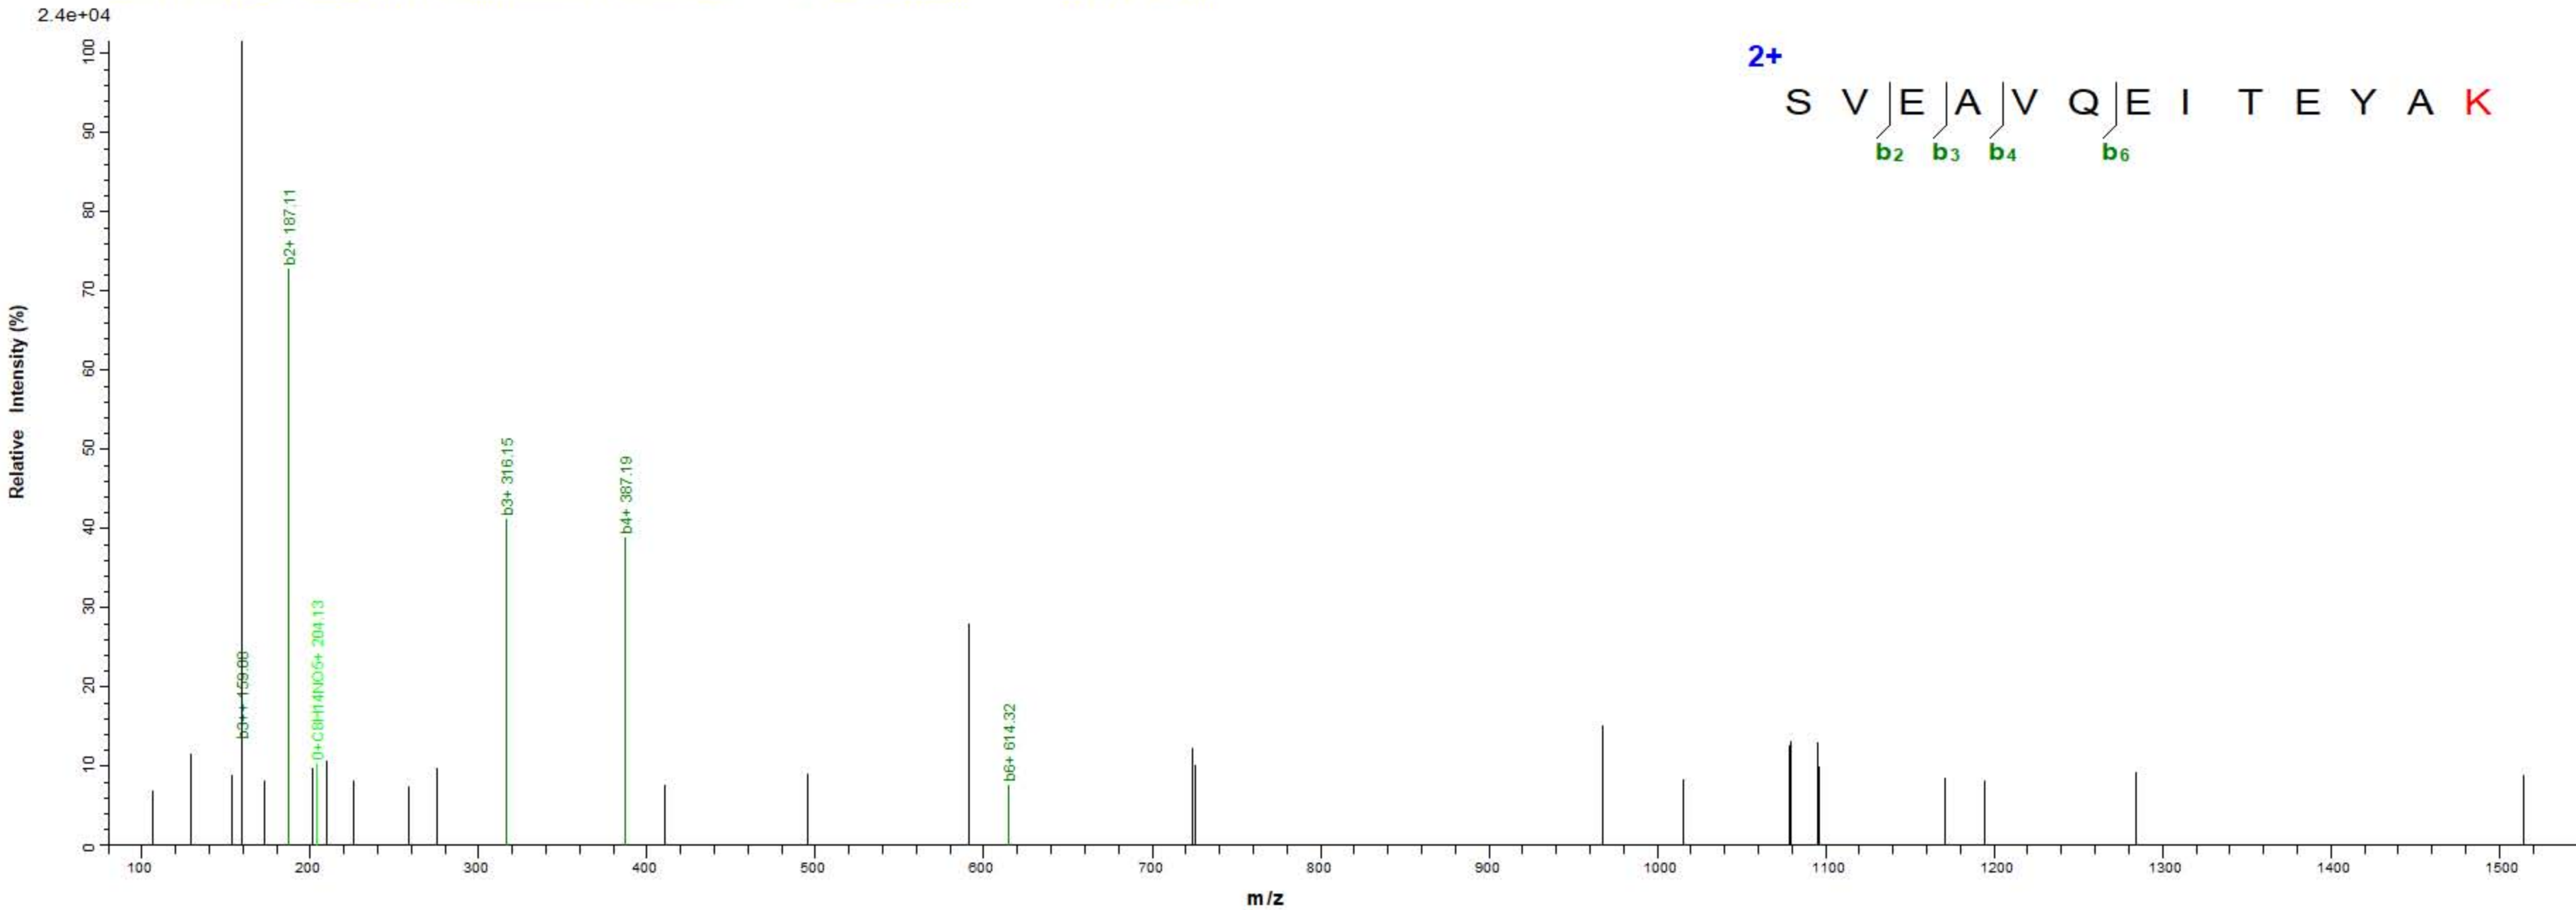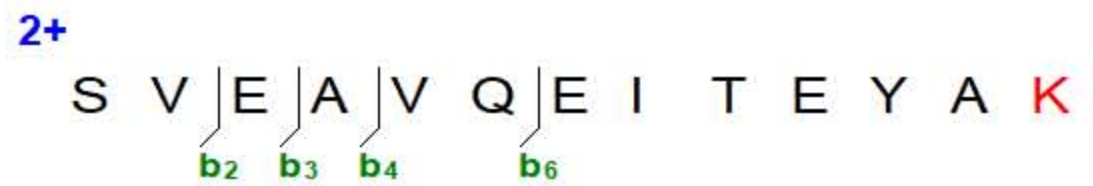

Supplement: supp_RA119.009282_152728_2_supp_411612_pzgm0s.pdf [file supp_RA119.009282_152728_2_supp_411612_pzgm0s.pdf]
